# Supplementary material for: Genetic Targeting of GRP78 in the VMH Improves Obesity Independently of Food Intake
Source: MDPI journal article supplement (doi:10.3390/genes9070357), 2018-07-17
Supplement: s1 [file s1]

**Supplemental Table 1.** Primers and probes for real-time PCR (TaqMan®) analysis.

| mRNA                           | GenBank          |           | Sequence                                                                    |
|--------------------------------|------------------|-----------|-----------------------------------------------------------------------------|
|                                | Accession Number |           |                                                                             |
| <b>CIDEA</b>                   | NM_001170467.1   | Assay ID  | Applied Biosystems TaqMan® Gene Expression Assays<br>Assay ID Rn04181355_m1 |
| <b>HPRT</b>                    | NM_012583        | Fw Primer | 5'-AGCCGACCGGTTCTGTCAT-3'                                                   |
|                                |                  | Rv Primer | 5'-GGTCATAACCTGGTTCATCATCAC -3'                                             |
|                                |                  | Probe     | FAM-5'- CGACCCTCAGTCCCAGCGTCGTGAT 3'-TAMRA                                  |
| <b>PGC1<math>\alpha</math></b> | NM_031347        | Fw Primer | 5'-CGATCACCATATTCCAGGTCAAG-3'                                               |
|                                |                  | Rv Primer | 5'-CGATGTGTGCGGTGTCTGTAGT -3'                                               |
|                                |                  | Probe     | 5'-AGGTCCCCAGGCAGTAGATCCTCTTCAAGA -3'                                       |
| <b>PPAR<math>\gamma</math></b> | NM_013124        | Fw Primer | 5'-TGGGCCAGAATGGCATCTC-3'                                                   |
|                                |                  | Rv Primer | 5'-CTGATGCACTGCCTATGAGCACTTCACA-3'                                          |
|                                |                  | Probe     | FAM-5'-CTAACTCCCAGAAAAGCAAGCAA-3'-TAMRA                                     |
| <b>PRDM16</b>                  | XM_008764418.1   | Assay ID  | Applied Biosystems TaqMan® Gene Expression Assays<br>Assay ID Mm01266512_m1 |
| <b>UCP3</b>                    |                  | Assay ID  | Applied Biosystems TaqMan® Gene Expression Assays<br>Assay ID Rn00565874_m1 |
